# Supplementary material
Source: PubMed Central journal article supplement (PMC4160177)
Supplement: NIHMS624362-supplement-01.pdf [file NIHMS624362-supplement-01.pdf]

## SUPPLEMENTAL DATA

### Supplemental Figure S1

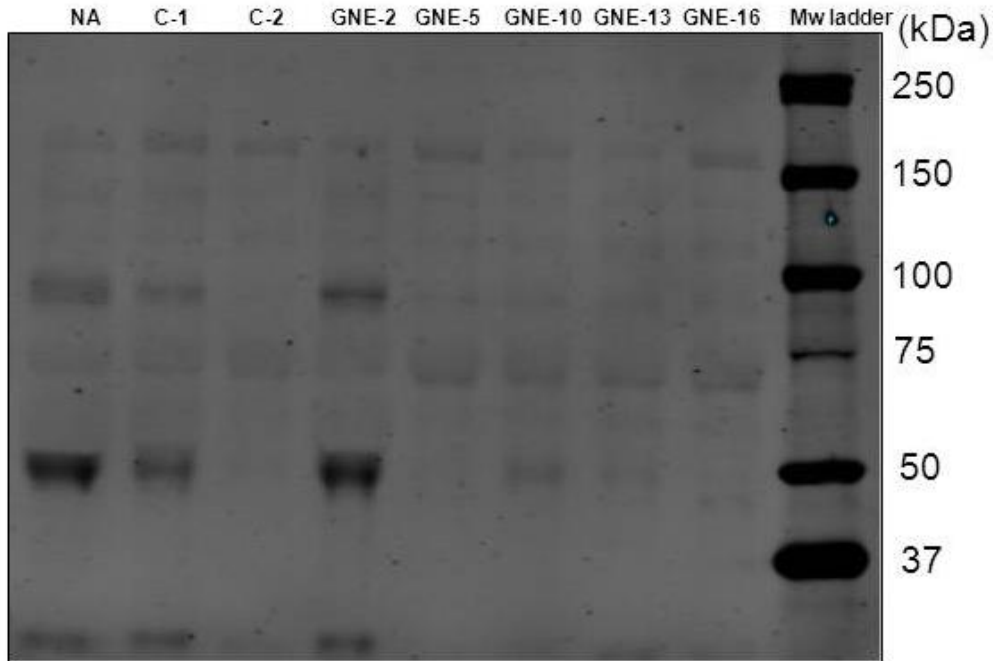

**Figure S1: NCAM (RNL-1) immunoblotting of serum glycoproteins.**

Serum samples (20  $\mu$ g) from neuraminidase treated control (NA), control (C-1, C-2), and GNE myopathy patients were immunoblotted with NCAM antibodies (RNL-1; sc-53007), as described by Valles-Ayoub et al. [25]. In contrast to the immunoblotting with the NCAM-H300 antibody (see **Figure 1**), immunoblotting with the NCAM-RNL-1 antibody does not show a different banding pattern in serum of GNE myopathy patients compared to control serum. Note that neuraminidase treated control serum did not show a different banding pattern either.

## Supplemental Figure S2

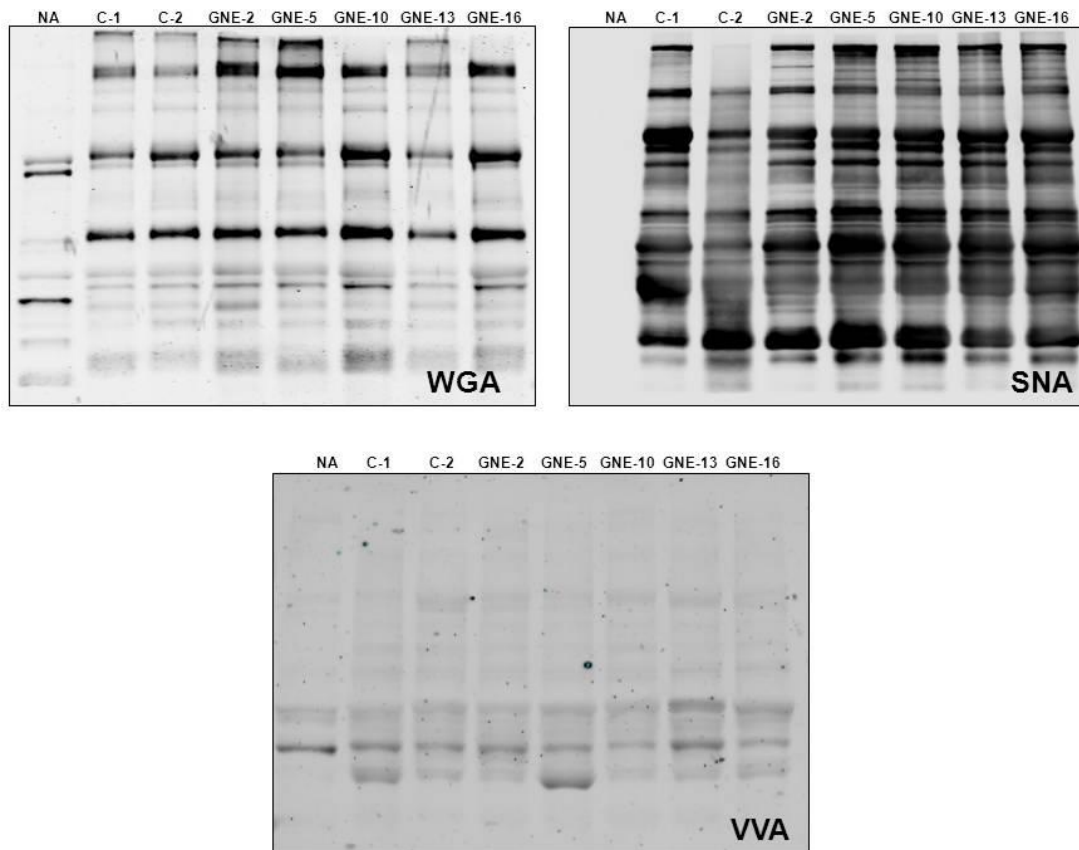

**Supplementary Figure S2. Western blotting followed by lectin staining of serum glycoproteins.** Control (C-1, C-2), Neuraminidase treated control (NA), and GNE myopathy patients (GNE-2, -5,-10, -13,-16) serum was electrophoresed on SDS-PAGE gels, followed by electroblotting on nitrocellulose membranes. The membranes were incubated with the lectins SNA, WGA, or VVA. 10  $\mu$ g of total serum protein was loaded in the WGA and SNA labeled blots, and 20  $\mu$ g total serum protein was loaded in the VVA labeled blot. Note that the NA-treated control samples showed the expected reduction (for WGA and SNA) or increase (for VVA) in lectin binding, no significant differences in binding were present in GNE myopathy patients' compared to control samples.

**Supplemental Table S1. Absolute T- and ST-values.**

(normal ranges are highlighted in gray)

|           | T/ST               | T-(uM)             | ST-(uM)              |
|-----------|--------------------|--------------------|----------------------|
|           | Normal Range       |                    |                      |
|           | <b>0.013-0.052</b> | <b>0.280-1.398</b> | <b>14.145-30.373</b> |
| control1  | 0.03600597         | 0.88012959         | 24.44399043          |
| control2  | 0.024737589        | 0.588552916        | 23.79184665          |
| control3  | 0.050357143        | 0.761339093        | 15.1187905           |
| control4  | 0.032507317        | 0.642548596        | 19.76627584          |
| control5  | 0.025486765        | 0.411987041        | 16.16474456          |
| control6  | 0.031530351        | 0.750539957        | 23.8037295           |
| control7  | 0.029221739        | 0.772138229        | 26.42341804          |
| control8  | 0.046083558        | 0.664146868        | 14.4117967           |
| control9  | 0.049351003        | <b>1.398488121</b> | 28.33758262          |
| control10 | 0.038265244        | 0.88012959         | 23.00075734          |
| control11 | 0.030472441        | 0.696544276        | 22.85817135          |
| control12 | 0.027367188        | 0.610151188        | 22.29499059          |
| control13 | 0.046306667        | 0.745140389        | 16.09142792          |
| control14 | 0.018971846        | 0.524298056        | 27.63558443          |
| control15 | 0.037186567        | 1.069114471        | 28.75001788          |
| control16 | 0.038818182        | 0.6587473          | 16.97007097          |
| control17 | 0.024343887        | 0.530777538        | 21.80331903          |
| control18 | 0.035924419        | 0.599352052        | 16.68369524          |
| control19 | 0.049971264        | 0.761339093        | 15.23553791          |
| control20 | 0.025650000        | 0.510259179        | 19.89314539          |
| control21 | 0.021967647        | 0.415766739        | 18.92632095          |
| control22 | 0.030728933        | 0.772138229        | 25.12740157          |
| control23 | 0.024683866        | 0.471382289        | 19.09677734          |
| control24 | 0.030382483        | 0.782937365        | 25.76936702          |
| control25 | 0.025054667        | 0.534017279        | 21.31408435          |
| control26 | 0.044735941        | 0.923326134        | 20.63947034          |
| control27 | 0.025197952        | 0.57775378         | 22.92860049          |
| control28 | 0.030213308        | 0.874730022        | 28.9518123           |
| control29 | 0.035377778        | 1.074514039        | <b>30.37257019</b>   |
| control30 | 0.024160494        | 0.556155508        | 23.01921109          |
| control31 | 0.017500000        | <b>0.279697624</b> | 15.98272138          |
| control32 | 0.024002206        | 0.435205184        | 18.13188278          |
| control33 | 0.019414154        | 0.387149028        | 19.94158649          |
| control34 | <b>0.012814286</b> | 0.336933045        | 26.29354869          |

|             |                    |                    |                    |
|-------------|--------------------|--------------------|--------------------|
| control35   | 0.024096774        | 0.63174946         | 26.21717973        |
| control36   | 0.019197519        | 0.350431965        | 18.25402355        |
| control37   | 0.030564741        | 0.858531317        | 28.08894459        |
| control38   | 0.048591633        | 0.93412527         | 19.223994          |
| control39   | <b>0.052225564</b> | 0.815334773        | 15.61179453        |
| control40   | 0.032775000        | 0.534017279        | 16.29343337        |
| control41   | 0.040855824        | 0.701943844        | 17.1809984         |
| control42   | 0.035728827        | 0.63174946         | 17.68178546        |
| control43   | 0.034503188        | 0.842332613        | 24.41318208        |
| control44   | 0.032090347        | 0.723542117        | 22.54703345        |
| control45   | 0.028532927        | 0.712742981        | 24.97966594        |
| control46   | 0.037646341        | 0.680345572        | 18.07202363        |
| Control47   | 0.029976062        | 0.534017279        | 17.81479103        |
| Control48   | 0.047432705        | 0.799136069        | 16.84778604        |
| Control49   | 0.045426647        | 0.642548596        | <b>14.14475077</b> |
| Control50   | 0.043903104        | 0.93412527         | 21.27697553        |
| <b>mean</b> | <b>0.032966801</b> | <b>0.684082073</b> | <b>21.1724522</b>  |
| <b>SD</b>   | <b>0.009865643</b> | <b>0.211104208</b> | <b>4.441626615</b> |

| Patient   | GNE allele 1 | GNE allele 2 | T/ST             | T<br>(uM)          | ST<br>(uM)           |
|-----------|--------------|--------------|------------------|--------------------|----------------------|
|           |              |              |                  | Normal Range       |                      |
|           |              |              | <b>&lt;0.052</b> | <b>0.280-1.398</b> | <b>14.145-30.373</b> |
| GNE-2     | c.1909+5G>A  | p.V696M      | 0.10652626       | 1.34449244         | 12.62123039          |
| GNE-5     | p.M712T      | p.M712T      | 0.07277276       | 1.02051836         | 14.02335691          |
| GNE-10    | p.D213V      | p.V696M      | 0.10549956       | 1.24190065         | 11.77161965          |
| GNE-13    | p.M712T      | p.M712T      | 0.13382721       | 1.08531317         | 8.10980918           |
| GNE-14    | p.V216A      | p.A631V      | 0.06943573       | 0.84773218         | 12.20887551          |
| GNE-16    | p.M712T      | p.M712T      | 0.09924569       | 1.65766739         | 16.70266379          |
| GNE-20    | p.W513X      | p.A631V      | 0.07734388       | 1.18250540         | 15.28893296          |
| GNE-21    | p.D378Y      | p.A631V      | 0.08537143       | 0.88552916         | 10.37266416          |
| GNE-28    | p.R129X      | p.V696M      | 0.09140743       | 1.56317495         | 17.10118034          |
| GNE-32    | p.M712T      | p.M712T      | 0.06578169       | 0.98002160         | 14.89809162          |
| GNE-980   | p.M712T      | p.M712T      | 0.10246480       | 1.36609071         | 13.33229279          |
| GNE-981   | p.M712T      | p.M712T      | 0.11202826       | 1.53347732         | 13.68830792          |
| GNE-914a  | p.M712T      | p.M712T      | 0.10040766       | 0.22084233         | 2.19945707           |
| GNE-914b* | p.M712T      | p.M712T      | 0.04536585       | 0.40172786         | 8.85529158           |
